# Supplementary material for: Antidepressant Screening Demonstrated Non-Monotonic Responses to Amitriptyline, Amoxapine and Sertraline in Locomotor Activity Assay in Larval Zebrafish
Source: PubMed Central journal article supplement (PMC8066259; doi:10.3390/cells10040738), 2021-03-26
Supplement: cells-10-00738-s001.pdf [file cells-10-00738-s001.pdf]

## Supplementary Data

**Table S1.** The P value of two-way ANOVA from each zebrafish larvae locomotor activity endpoints displayed in Figure 2 (\* P < 0.05, \*\* P<0.01, \*\*\* P < 0.001, \*\*\*\* P < 0.0001). Abbreviation: Amitriptyline hydrochloride (AMY), amoxapine (AMO), atomoxetine hydrochloride (ATM), bupropion hydrochloride (BUP), doxepin hydrochloride (DOX) duloxetine hydrochloride (DLX), escitalopram oxalate (ESC), fluoxetine hydrochloride (FLX), imipramine hydrochloride (IMP), mianserin hydrochloride (MIA), milnacipran (MCP), moclobemide (MEM), and venlafaxine hydrochloride (VEN), mirtazapine (MRT), Paroxetine (PAR), Selegiline hydrochloride (SEG), Sertraline hydrochloride (SRT), Trazodone hydrochloride (TRA).

| Behavior Endpoints   | Antidepressants    | Difference Between Means $\pm$ Standard Error (Treated – Control) | F(1, 190) (F (DFn, DFd)) | P Value  | Significance |
|----------------------|--------------------|-------------------------------------------------------------------|--------------------------|----------|--------------|
| Total Distance       | MEM                | -15.69 $\pm$ 4.476                                                | 12.28                    | 0.0006   | ***          |
|                      | TRA                | -12.79 $\pm$ 4.552                                                | 7.889                    | 0.0055   | **           |
|                      | FLX                | -12.15 $\pm$ 4.374                                                | 7.717                    | 0.0060   | **           |
|                      | SRT                | -7.257 $\pm$ 4.967                                                | 2.135                    | 0.1456   | n.s.         |
|                      | ESC                | -2.823 $\pm$ 5.434                                                | 0.2699                   | 0.6040   | n.s.         |
|                      | DLX                | -17.08 $\pm$ 4.391                                                | 15.13                    | 0.0001   | ***          |
|                      | ATM                | -9.736 $\pm$ 5.755                                                | 2.863                    | 0.0923   | n.s.         |
|                      | VEN                | -18.16 $\pm$ 4.529                                                | 16.09                    | < 0.0001 | ****         |
|                      | IMP                | -12.92 $\pm$ 4.388                                                | 8.670                    | 0.0036   | **           |
|                      | PAR                | -9.025 $\pm$ 5.038                                                | 3.290                    | 0.0748   | n.s.         |
|                      | MRT                | 14.69 $\pm$ 8.184                                                 | 3.223                    | 0.0742   | n.s.         |
|                      | AMY                | -2.730 $\pm$ 4.375                                                | 0.3894                   | 0.5334   | n.s.         |
|                      | DOX                | -13.97 $\pm$ 6.985                                                | 4.002                    | 0.0469   | *            |
|                      | AMO                | 2.302 $\pm$ 4.976                                                 | 0.2141                   | 0.6441   | n.s.         |
|                      | BUP                | -17.08 $\pm$ 4.559                                                | 14.04                    | 0.0002   | ***          |
|                      | MIA                | -7.842 $\pm$ 5.105                                                | 2.380                    | 0.1261   | n.s.         |
|                      | MCP                | -20.06 $\pm$ 4.423                                                | 20.58                    | < 0.0001 | ****         |
| SEG                  | -22.51 $\pm$ 4.350 | 26.78                                                             | < 0.0001                 | ****     |              |
| Burst Movement Count | MEM                | -2.808 $\pm$ 0.7238                                               | 15.04                    | 0.0001   | ***          |
|                      | TRA                | 0.1247 $\pm$ 0.8241                                               | 0.02291                  | 0.8799   | n.s.         |
|                      | FLX                | -0.3625 $\pm$ 0.7596                                              | 0.2277                   | 0.6337   | n.s.         |
|                      | SRT                | -2.832 $\pm$ 0.7296                                               | 15.06                    | 0.0001   | ***          |
|                      | ESC                | -2.569 $\pm$ 0.7112                                               | 13.05                    | 0.0004   | ***          |
|                      | DLX                | -4.723 $\pm$ 0.6909                                               | 46.74                    | < 0.0001 | ****         |
|                      | ATM                | -4.415 $\pm$ 0.6905                                               | 40.88                    | < 0.0001 | ****         |
|                      | VEN                | -4.940 $\pm$ 0.6907                                               | 51.17                    | < 0.0001 | ****         |
|                      | IMP                | -4.588 $\pm$ 0.6952                                               | 43.56                    | < 0.0001 | ****         |
|                      | PAR                | -3.925 $\pm$ 0.7501                                               | 27.38                    | < 0.0001 | ****         |
|                      | MRT                | -0.5326 $\pm$ 0.7678                                              | 0.4811                   | 0.4888   | n.s.         |
| AMY                  | 1.977 $\pm$ 0.7659 | 6.660                                                             | 0.0106                   | *        |              |

|                           |                   |                    |          |             |             |
|---------------------------|-------------------|--------------------|----------|-------------|-------------|
|                           | <b>DOX</b>        | -5.536 ± 0.6841    | 65.50    | < 0.0001    | <b>****</b> |
|                           | <b>AMO</b>        | 8.995 ± 1.656      | 29.50    | < 0.0001    | <b>****</b> |
|                           | <b>BUP</b>        | -4.082 ± 0.6977    | 34.22    | < 0.0001    | <b>****</b> |
|                           | <b>MIA</b>        | 8.254 ± 1.339      | 38.02    | < 0.0001    | <b>****</b> |
|                           | <b>MCP</b>        | -1.207 ± 0.7579    | 2.538    | 0.1128      | n.s.        |
|                           | <b>SEG</b>        | -3.066 ± 0.7251    | 17.89    | < 0.0001    | <b>****</b> |
| <b>Rotation<br/>Count</b> | <b>MEM</b>        | -0.1876 ± 0.03508  | 28.60    | < 0.0001    | <b>****</b> |
|                           | <b>TRA</b>        | -0.1751 ± 0.03537  | 24.51    | < 0.0001    | <b>****</b> |
|                           | <b>FLX</b>        | -0.1462 ± 0.03644  | 16.09    | < 0.0001    | <b>****</b> |
|                           | <b>SRT</b>        | 0.02257 ± 0.04374  | 0.2663   | 0.6065      | n.s.        |
|                           | <b>ESC</b>        | -0.3993 ± 0.03696  | 1.167    | 0.2813      | n.s.        |
|                           | <b>DLX</b>        | -0.2618 ± 0.03357  | 60.82    | < 0.0001    | <b>****</b> |
|                           | <b>ATM</b>        | -0.2280 ± 0.03428  | 44.21    | < 0.0001    | <b>****</b> |
|                           | <b>VEN</b>        | -0.2576 ± 0.03375  | 58.28    | < 0.0001    | <b>****</b> |
|                           | <b>IMP</b>        | -0.2563 ± 0.03368  | 57.94    | < 0.0001    | <b>****</b> |
|                           | <b>PAR</b>        | -0.2181 ± 0.03705  | 34.64    | < 0.0001    | <b>****</b> |
|                           | <b>MRT</b>        | 0.06788 ± 0.04006  | 2.871    | 0.0918      | n.s.        |
|                           | <b>AMY</b>        | -0.1727 ± 0.03386  | 26.03    | < 0.0001    | <b>****</b> |
|                           | <b>DOX</b>        | -0.3048 ± 0.03317  | 84.40    | < 0.0001    | <b>****</b> |
|                           | <b>AMO</b>        | -0.07196 ± 0.04266 | 2.846    | 0.0932      | n.s.        |
|                           | <b>BUP</b>        | -0.2993 ± 0.03320  | 81.30    | < 0.0001    | <b>****</b> |
|                           | <b>MIA</b>        | -0.06988 ± 0.04494 | 2.418    | 0.1216      | n.s.        |
|                           | <b>MCP</b>        | -0.2566 ± 0.03358  | 58.40    | < 0.0001    | <b>****</b> |
| <b>SEG</b>                | -0.2756 ± 0.03335 | 68.28              | < 0.0001 | <b>****</b> |             |

**Table S2.** The two-way ANOVA test result details from each zebrafish larvae locomotor activity endpoint after treated with 3 different antidepressants in comparison to the control group displayed in Figure S2 (\*P < 0.05, \*\*\*\* P < 0.0001). Abbreviation: Amitriptyline hydrochloride (AMY), amoxapine (AMO), Sertraline hydrochloride (SRT).

| <b>Behavior Endpoints</b> | <b>Antidepressants</b> |         | <b>F Time (Row Factor)<br/>(F (DFn, DFd))</b> | <b>F Column Factor<br/>(F (DFn, DFd))</b> | <b>P Value</b> | <b>Significance</b> |
|---------------------------|------------------------|---------|-----------------------------------------------|-------------------------------------------|----------------|---------------------|
| Total Distance            | <b>AMY</b>             | 1 ppb   | F (10.55, 4747) = 38.66<br>P < 0.0001         | F (3, 450) = 1.681<br>P = 0.1704          | 0.0111         | <b>*</b>            |
|                           |                        | 10 ppb  |                                               |                                           | < 0.0001       | <b>****</b>         |
|                           |                        | 100 ppb |                                               |                                           | < 0.0001       | <b>****</b>         |
|                           | <b>AMO</b>             | 1 ppb   | F (10.17, 4588) = 68.90<br>P < 0.0001         | F (3, 451) = 26.96<br>P < 0.0001          | < 0.0001       | <b>****</b>         |
|                           |                        | 10 ppb  |                                               |                                           | < 0.0001       | <b>****</b>         |
|                           |                        | 100 ppb |                                               |                                           | < 0.0001       | <b>****</b>         |
|                           | <b>SRT</b>             | 1 ppb   | F (10.73, 4838) = 76.08<br>P < 0.0001         | F (3, 451) = 5.140<br>P = 0.0017          | < 0.0001       | <b>****</b>         |
|                           |                        | 10 ppb  |                                               |                                           | < 0.0001       | <b>****</b>         |
|                           |                        | 100 ppb |                                               |                                           | < 0.0001       | <b>****</b>         |
|                           | <b>AMY</b>             | 1 ppb   | F (10.29, 4630) = 203.2                       | F (3, 450) = 42.40                        | < 0.0001       | <b>****</b>         |

|                      |                |         |                                        |                                        |                                  |          |
|----------------------|----------------|---------|----------------------------------------|----------------------------------------|----------------------------------|----------|
| Burst Movement Count |                | 10 ppb  | P < 0.0001                             | P < 0.0001                             | < 0.0001                         | ****     |
|                      |                | 100 ppb |                                        |                                        | < 0.0001                         | ****     |
|                      | AMO            | 1 ppb   | F (8.971, 4046) = 299.4<br>P < 0.0001  | F (3, 451) = 126.9<br>P < 0.0001       | < 0.0001                         | ****     |
|                      |                | 10 ppb  |                                        |                                        | < 0.0001                         | ****     |
|                      |                | 100 ppb |                                        |                                        | < 0.0001                         | ****     |
|                      | SRT            | 1 ppb   | F (4.931, 2224) = 235.1<br>P < 0.0001  | F (3, 451) = 15.19<br>P < 0.0001       | < 0.0001                         | ****     |
|                      |                | 10 ppb  |                                        |                                        | < 0.0001                         | ****     |
|                      |                | 100 ppb |                                        |                                        | < 0.0001                         | ****     |
|                      | Rotation Count | AMY     | 1 ppb                                  | F (22.92, 10312) = 62.56<br>P < 0.0001 | F (3, 450) = 8.053<br>P < 0.0001 | < 0.0001 |
| 10 ppb               |                |         | < 0.0001                               |                                        |                                  | ****     |
| 100 ppb              |                |         | < 0.0001                               |                                        |                                  | ****     |
| AMO                  |                | 1 ppb   | F (22.43, 10118) = 102.3<br>P < 0.0001 | F (3, 451) = 45.38<br>P < 0.0001       | < 0.0001                         | ****     |
|                      |                | 10 ppb  |                                        |                                        | < 0.0001                         | ****     |
|                      |                | 100 ppb |                                        |                                        | < 0.0001                         | ****     |
| SRT                  |                | 1 ppb   | F (20.62, 9300) = 66.22<br>P < 0.0001  | F (3, 451) = 11.54<br>P < 0.0001       | < 0.0001                         | ****     |
|                      |                | 10 ppb  |                                        |                                        | < 0.0001                         | ****     |
|                      |                | 100 ppb |                                        |                                        | < 0.0001                         | ****     |

**Table S3.** The Kruskal-Wallis test result details from each zebrafish larvae locomotor activity endpoint after treated with 3 different antidepressants in comparison to the control group displayed in Figure 4 (n.s. (not significant)  $P \geq 0.05$ , \*  $P < 0.05$ , \*\*  $P < 0.01$ , \*\*\*  $P < 0.001$ , \*\*\*\*  $P < 0.0001$ ). Abbreviation: Amitriptyline hydrochloride (AMY), amoxapine (AMO), Sertraline hydrochloride (SRT).

| Behavior Endpoints |             | Antidepressants |         | P Value  | Significance |
|--------------------|-------------|-----------------|---------|----------|--------------|
| Total Distance     | Light Cycle | AMY             | 1 ppb   | 0.0021   | **           |
|                    |             |                 | 10 ppb  | < 0.0001 | ****         |
|                    |             |                 | 100 ppb | < 0.0001 | ****         |
|                    |             | AMO             | 1 ppb   | < 0.0001 | ****         |
|                    |             |                 | 10 ppb  | < 0.0001 | ****         |
|                    |             |                 | 100 ppb | < 0.0001 | ****         |
|                    |             | SRT             | 1 ppb   | > 0.9999 | n.s.         |
|                    |             |                 | 10 ppb  | 0.0376   | *            |
|                    |             |                 | 100 ppb | < 0.0001 | ****         |
|                    | Dark Cycle  | AMY             | 1 ppb   | < 0.0001 | ****         |
|                    |             |                 | 10 ppb  | < 0.0001 | ****         |
|                    |             |                 | 100 ppb | 0.08181  | n.s.         |
|                    |             | AMO             | 1 ppb   | < 0.0001 | ****         |
|                    |             |                 | 10 ppb  | < 0.0001 | ****         |

|                            |             |            |          |             |             |
|----------------------------|-------------|------------|----------|-------------|-------------|
|                            |             | <b>SRT</b> | 100 ppb  | < 0.0001    | <b>****</b> |
|                            |             |            | 1 ppb    | 0.0967      | n.s.        |
|                            |             |            | 10 ppb   | < 0.0001    | <b>****</b> |
|                            |             |            | 100 ppb  | < 0.0001    | <b>****</b> |
| Burst<br>Movement<br>Count | Light Cycle | <b>AMY</b> | 1 ppb    | 0.2451      | n.s.        |
|                            |             |            | 10 ppb   | < 0.0001    | <b>****</b> |
|                            |             |            | 100 ppb  | > 0.9999    | n.s.        |
|                            |             | <b>AMO</b> | 1 ppb    | < 0.0001    | <b>****</b> |
|                            |             |            | 10 ppb   | < 0.0001    | <b>****</b> |
|                            |             |            | 100 ppb  | < 0.0001    | <b>****</b> |
|                            |             | <b>SRT</b> | 1 ppb    | 0.0002      | <b>***</b>  |
|                            |             |            | 10 ppb   | 0.0005      | <b>***</b>  |
|                            |             |            | 100 ppb  | < 0.0001    | <b>****</b> |
|                            | Dark Cycle  | <b>AMY</b> | 1 ppb    | < 0.0001    | <b>****</b> |
|                            |             |            | 10 ppb   | < 0.0001    | <b>****</b> |
|                            |             |            | 100 ppb  | < 0.0001    | <b>****</b> |
|                            |             | <b>AMO</b> | 1 ppb    | < 0.0001    | <b>****</b> |
|                            |             |            | 10 ppb   | < 0.0001    | <b>****</b> |
|                            |             |            | 100 ppb  | < 0.0001    | <b>****</b> |
|                            |             | <b>SRT</b> | 1 ppb    | < 0.0001    | <b>****</b> |
| 10 ppb                     |             |            | < 0.0001 | <b>****</b> |             |
| 100 ppb                    |             |            | < 0.0001 | <b>****</b> |             |
| Rotation<br>Count          | Light Cycle | <b>AMY</b> | 1 ppb    | > 0.9999    | n.s.        |
|                            |             |            | 10 ppb   | < 0.0001    | <b>****</b> |
|                            |             |            | 100 ppb  | < 0.0001    | <b>****</b> |
|                            |             | <b>AMO</b> | 1 ppb    | < 0.0001    | <b>****</b> |
|                            |             |            | 10 ppb   | < 0.0001    | <b>****</b> |
|                            |             |            | 100 ppb  | < 0.0001    | <b>****</b> |
|                            |             | <b>SRT</b> | 1 ppb    | < 0.0001    | <b>****</b> |
|                            |             |            | 10 ppb   | 0.9210      | n.s.        |
|                            |             |            | 100 ppb  | < 0.0001    | <b>****</b> |
|                            | Dark Cycle  | <b>AMY</b> | 1 ppb    | < 0.0001    | <b>****</b> |
|                            |             |            | 10 ppb   | < 0.0001    | <b>****</b> |
|                            |             |            | 100 ppb  | < 0.0001    | <b>****</b> |
| <b>AMO</b>                 |             | 1 ppb      | < 0.0001 | <b>****</b> |             |
|                            |             | 10 ppb     | < 0.0001 | <b>****</b> |             |
|                            |             | 100 ppb    | < 0.0001 | <b>****</b> |             |

|  |  |     |         |          |      |
|--|--|-----|---------|----------|------|
|  |  |     | 1 ppb   | < 0.0001 | **** |
|  |  | SRT | 10 ppb  | < 0.0001 | **** |
|  |  |     | 100 ppb | < 0.0001 | **** |

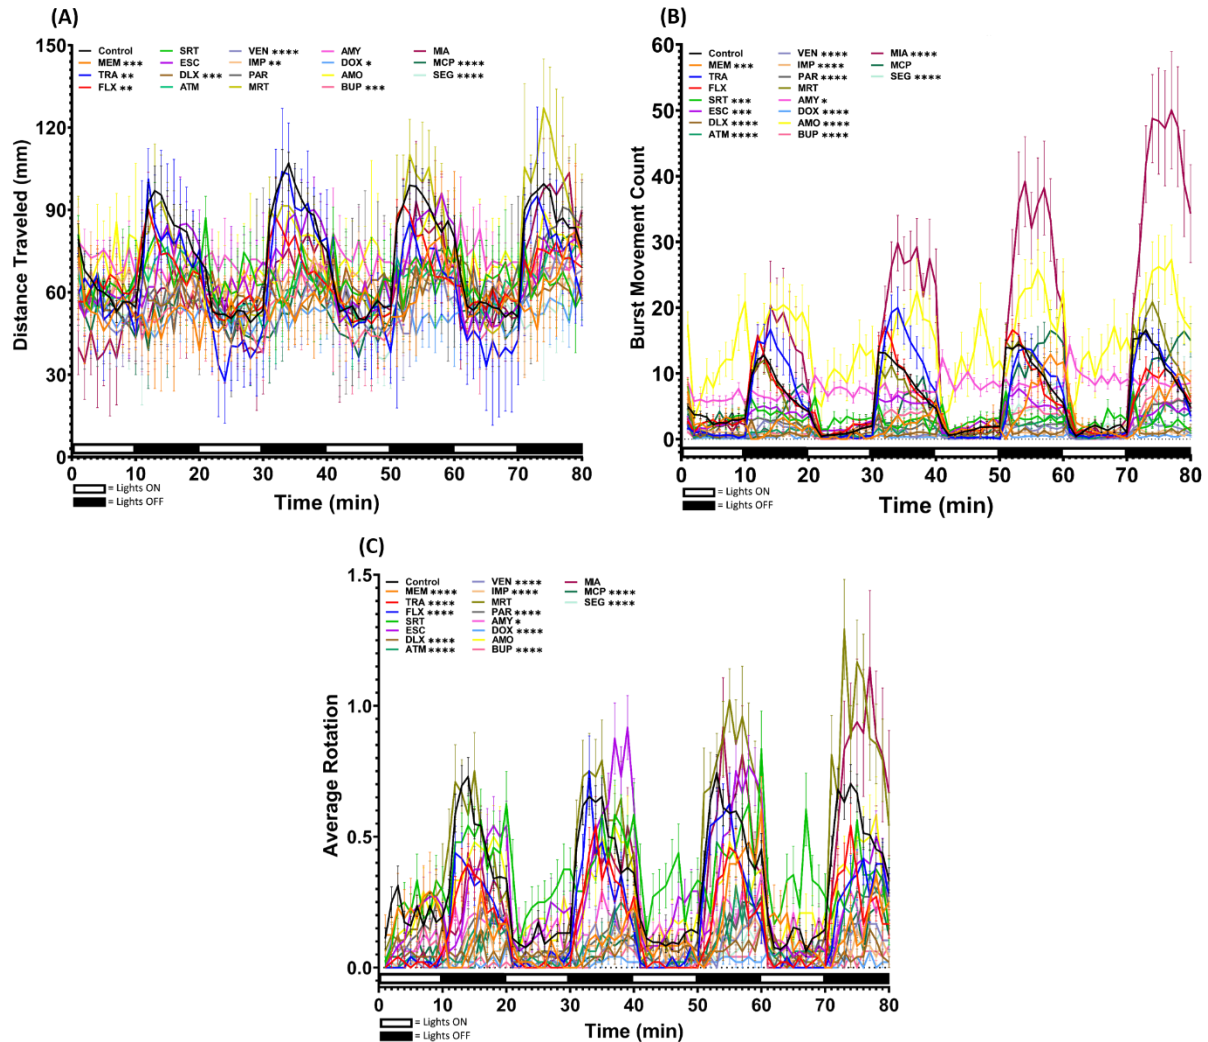

**Figure S1.** (A) Average distance traveled, (B) average burst movement, and (C) average rotation counts per minute by zebrafish larvae after 1-day exposure of 0 (control) and 1 mg/L of 18 different antidepressants during both light and dark cycles. A two-way ANOVA test was used to compare all treatments with the control. Data are presented as median with 95% CI for (A) and as mean with SEM for (B) and (C) ( $n = 144$  for control,  $n = 48$  for each tested antidepressant; \*  $P < 0.05$ , \*\*  $P < 0.01$ , \*\*\*  $P < 0.001$ , \*\*\*\*  $P < 0.0001$ ). Abbreviation: Amitriptyline hydrochloride (AMY), amoxapine (AMO), atomoxetine hydrochloride (ATM), bupropion hydrochloride (BUP), doxepin hydrochloride (DOX) duloxetine hydrochloride (DLX), escitalopram oxalate (ESC), fluoxetine hydrochloride (FLX), imipramine hydrochloride (IMP), mianserin hydrochloride (MIA), milnacipran (MCP), moclobemide (MEM), and venlafaxine hydrochloride (VEN), mirtazapine (MRT), Paroxetine (PAR), Selegiline hydrochloride (SEG), Sertraline hydrochloride (SRT), Trazodone hydrochloride (TRA).

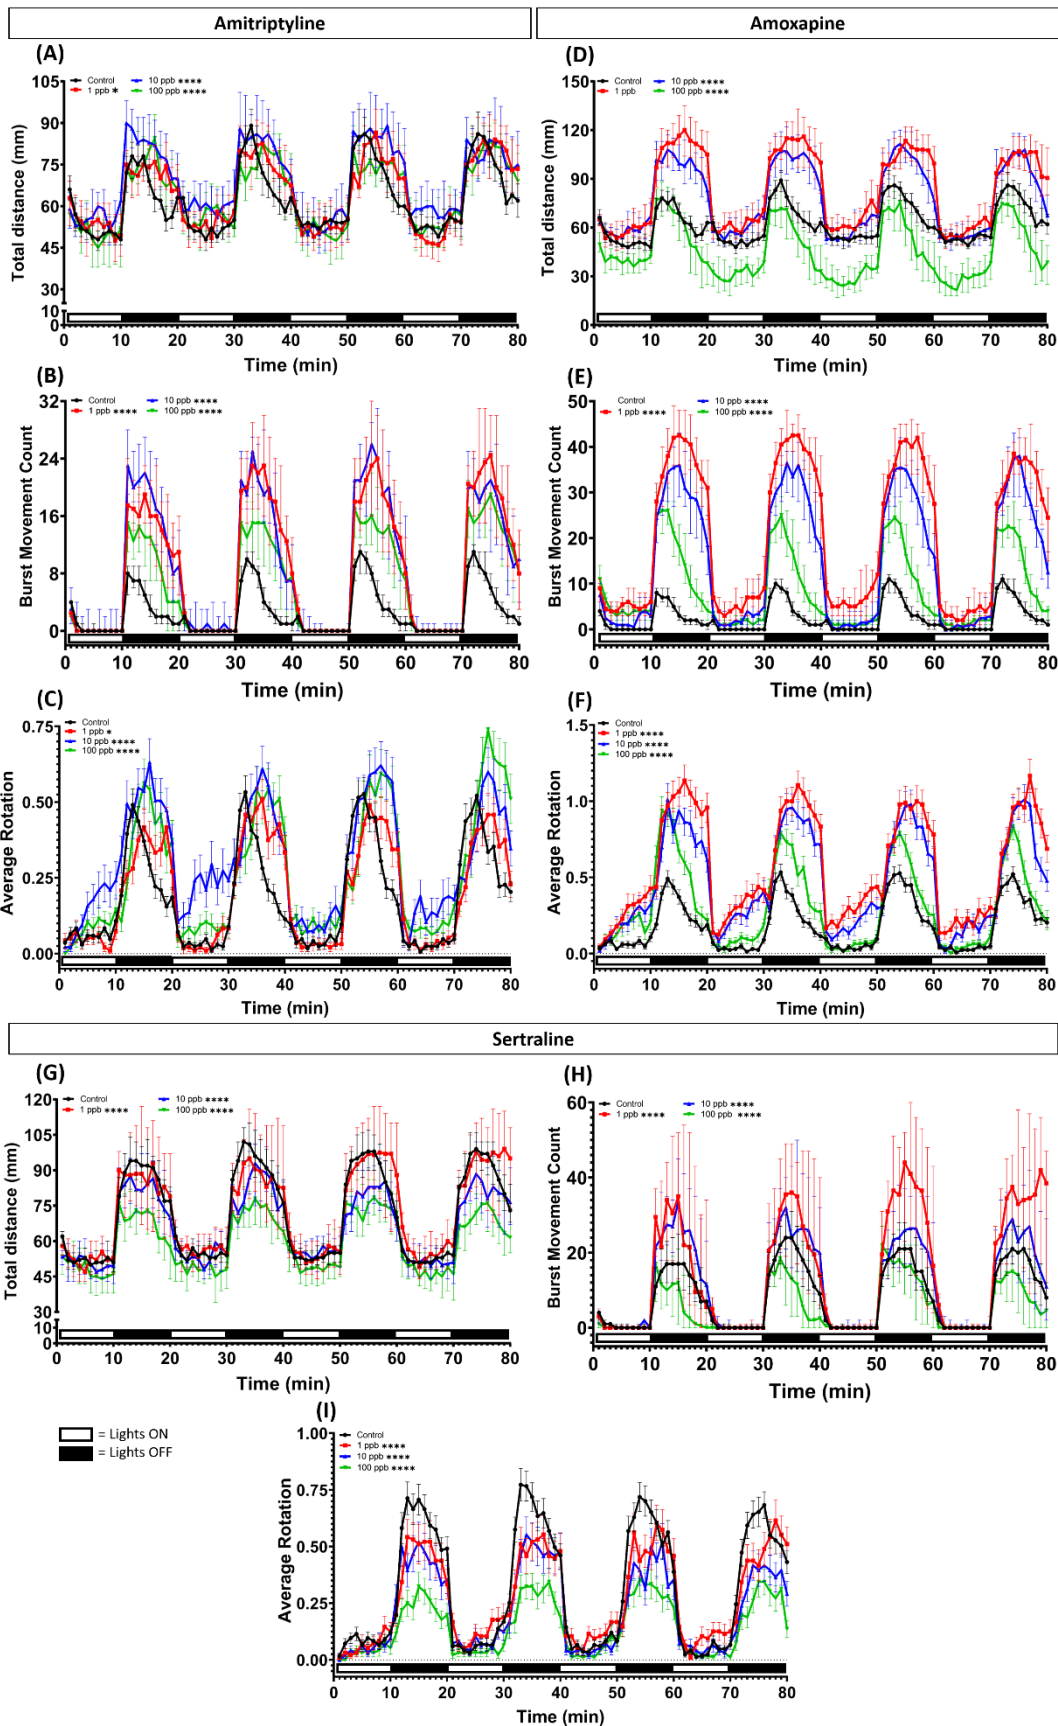

**Figure S2.** (A, D, G) Average distance traveled, (B, E, H) average burst movement, and (C, F, I) average rotation counts per minute by zebrafish larvae after 1-day exposure of 0 (control), 1 ppb, 10 ppb, and 100 ppb of amitriptyline, amoxapine, and sertraline during both light and dark cycles. A

two-way ANOVA test with Geisser-Greenhouse's correction continued with Dunnett's multiple comparisons test was carried out to compare all treatments with the control. The average distance traveled data are presented as median with 95% CI while the rest of the data are expressed as mean with SEM ( $n = 167$  for control,  $n = 96$  for each concentration of tested antidepressants group, except 10 ppb amitriptyline group ( $n = 95$ ), \*  $P < 0.05$ , \*\*\*\*  $P < 0.0001$ ).

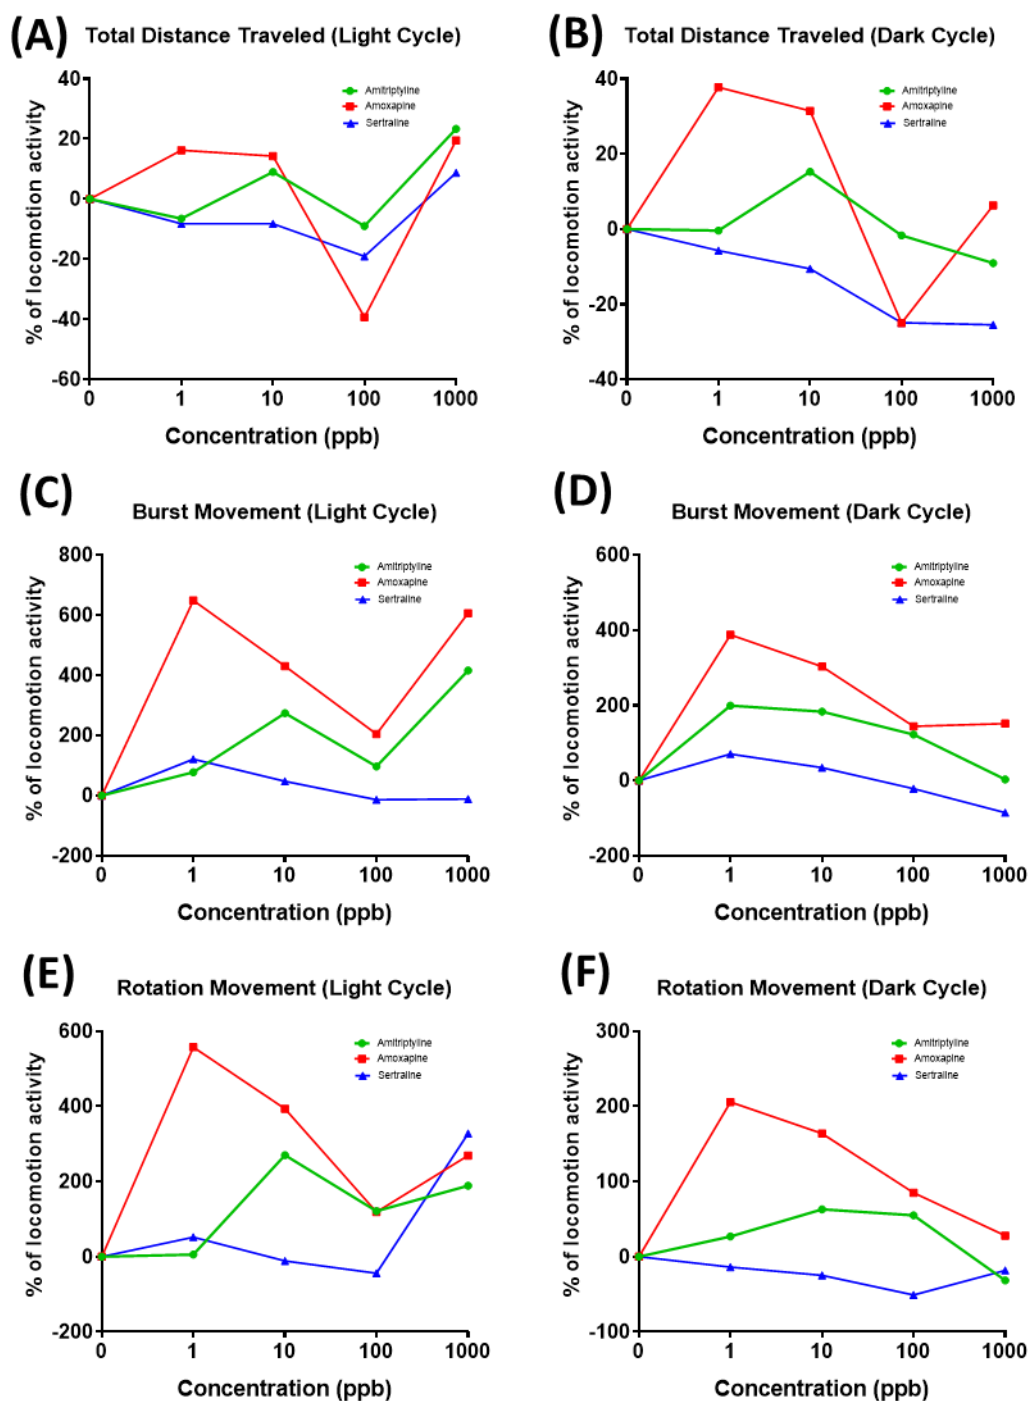

**Figure S3.** Comparison of non-monotonic dose response curve (A & B) average total distance traveled, (C & D) average burst movement, and (E & F) rotation count of zebrafish larvae after 1-day exposure

of 0 (control), 1 ppb, 10 ppb, and 100 ppb of amitriptyline (green color), amoxapine (red color), and sertraline (blue color) during both light and dark cycles.
